# Supplementary material for: Energy decomposition analysis for excited states: an extension based on TDDFT
Source: Royal Society of Chemistry journal article supplement (doi:10.1039/d4cp04207g), 2025-01-01
Supplement: d4cp04207g1.pdf [file d4cp04207g1.pdf]

**Supplementary information for**

**Energy Decomposition Analysis for excited states:  
An Extension based on TDDFT**

*Florian Kreuter and Ralf Tonner-Zech\**

*Wilhelm-Ostwald-Institut für Physikalische und Theoretisch Chemie, Universität Leipzig, Linnéstr.*

*2, 04103 Leipzig, Germany*

e-mail: [ralf.tonner@uni-leipzig.de](mailto:ralf.tonner@uni-leipzig.de)

## Ground state EDA for the test set

The ground state EDA results for the different functional were taken from the exc-EDA calculation. Because of that there is only the decomposition of interaction energy.

**Table S1.** Ground state EDA result for fluorenone-methanol.

|                              | PBE0 | B3LYP | CAMY-B3LYP | LC-BLYP | LC-PBE |     |     |     |     |     |
|------------------------------|------|-------|------------|---------|--------|-----|-----|-----|-----|-----|
| $\Delta E_{inter}^{GS}$      | -29  | -26   | -32        | -38     | -33    |     |     |     |     |     |
| $\Delta E_{Pauli}^{GS}$      | 36   | 41    | 35         | 29      | 32     |     |     |     |     |     |
| $\Delta E_{elstat}^{GS [a]}$ | -44  | 68%   | -45        | 67%     | -46    | 69% | -47 | 70% | -46 | 70% |
| $\Delta E_{orb}^{GS [a]}$    | -21  | 32%   | -22        | 33%     | -21    | 31% | -20 | 30% | -20 | 30% |

[a] Percentage values give the relative contributions to the attractive EDA terms  $\Delta E_{elstat}$  and  $\Delta E_{orb}$ . Energies in  $\text{kJ mol}^{-1}$ .

**Table S2.** Ground state EDA result for quinoline-water.

|                              | PBE0 | B3LYP | CAMY-B3LYP | LC-BLYP | LC-PBE |     |     |     |     |     |
|------------------------------|------|-------|------------|---------|--------|-----|-----|-----|-----|-----|
| $\Delta E_{inter}^{GS}$      | -32  | -28   | -34        | -40     | -37    |     |     |     |     |     |
| $\Delta E_{Pauli}^{GS}$      | 50   | 56    | 50         | 44      | 46     |     |     |     |     |     |
| $\Delta E_{elstat}^{GS [a]}$ | -55  | 67%   | -56        | 67%     | -57    | 67% | -59 | 70% | -58 | 70% |
| $\Delta E_{orb}^{GS [a]}$    | -27  | 33%   | -27        | 33%     | -27    | 33% | -25 | 30% | -25 | 30% |

[a] Percentage values give the relative contributions to the attractive EDA terms  $\Delta E_{elstat}$  and  $\Delta E_{orb}$ . Energies in  $\text{kJ mol}^{-1}$ .

**Table S3.** Ground state EDA result for benzene-TCNE.

|                              | PBE0 | B3LYP | CAMY-B3LYP | LC-BLYP | LC-PBE |     |     |     |     |     |
|------------------------------|------|-------|------------|---------|--------|-----|-----|-----|-----|-----|
| $\Delta E_{inter}^{GS}$      | -16  | -10   | -16        | -24     | -21    |     |     |     |     |     |
| $\Delta E_{Pauli}^{GS}$      | 8    | 15    | 9          | 3       | 5      |     |     |     |     |     |
| $\Delta E_{elstat}^{GS [a]}$ | -16  | 67%   | -17        | 68%     | -18    | 72% | -19 | 73% | -18 | 72% |
| $\Delta E_{orb}^{GS [a]}$    | -8   | 33%   | -8         | 32%     | -7     | 28% | -7  | 27% | -7  | 28% |

[a] Percentage values give the relative contributions to the attractive EDA terms  $\Delta E_{elstat}$  and  $\Delta E_{orb}$ . Energies in  $\text{kJ mol}^{-1}$ .

**Table S4**, Ground state EDA result for pyridine-water.

|                              | PBE0 |     | B3LYP |     | CAMY-B3LYP |     | LC-BLYP |     | LC-PBE |     |
|------------------------------|------|-----|-------|-----|------------|-----|---------|-----|--------|-----|
| $\Delta E_{inter}^{GS}$      | -8   |     | -4    |     | -9         |     | -15     |     | -13    |     |
| $\Delta E_{pauli}^{GS}$      | 16   |     | 21    |     | 15         |     | 10      |     | 11     |     |
| $\Delta E_{elstat}^{GS}$ [a] | -15  | 63% | -15   | 63% | -16        | 64% | -16     | 67% | -16    | 67% |
| $\Delta E_{orb}^{GS}$ [a]    | -9   | 37% | -9    | 37% | -9         | 36% | -8      | 33% | -8     | 33% |

[a] Percentage values give the relative contributions to the attractive EDA terms  $\Delta E_{elstat}$  and  $\Delta E_{orb}$ . Energies in  $\text{kJ mol}^{-1}$ .

## Ground-state EDA-NOCV results

To gain insight into the impact of excitation on the bonding in test systems, the orbital interaction was examined further using the EDA-NOCV at the B3LYP/TZP level. The resulting most important NOCV deformation densities are presented in Figure S1 for all test systems.

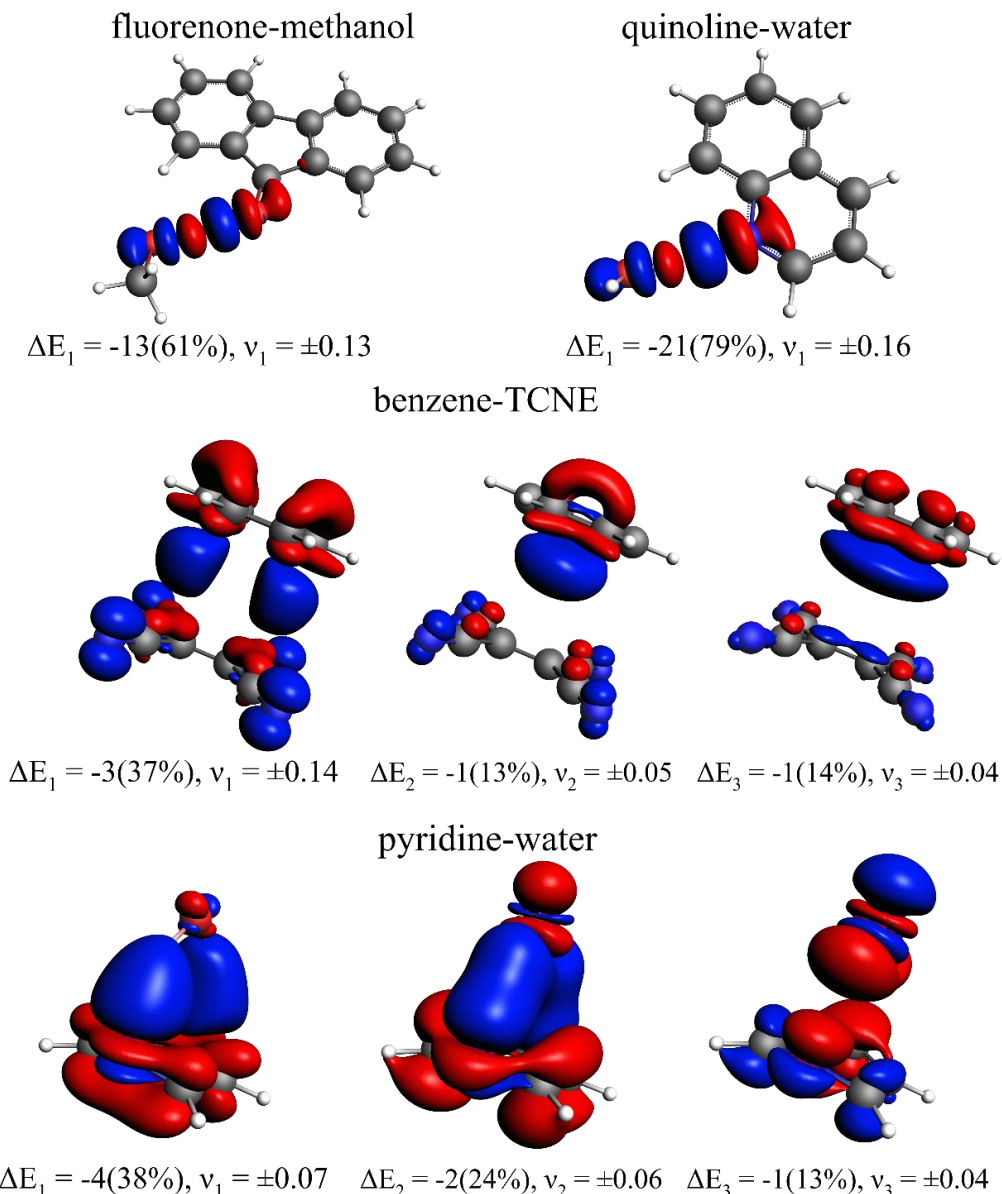

**Figure S1.** The most important NOCV deformation densities for the test system fluorenone-methanol (iso value = 0.0008), quinoline-water (iso value = 0.0008), benzene-TCNE (iso value = 0.0001) and pyridine-water (iso value = 0.0001). All energy contributions  $\Delta E_i$  in kJ/mol and eigenvalues  $v_i$  in e are given. Contribution to the total orbital interaction  $\Delta E_{\text{orb}}$  are given in brackets.

## Comparison of exc-EDA, GKS-EDA and ALMO-EDA

The electrostatic contribution of ALMO-EDA and GKS-EDA taken from their method paper correspond to quasi-electrostatic contribution of the exc-EDA. The Pauli contribution of ALMO-EDA and exc-EDA was also considered equal, which in turn corresponds to the exchange-repulsion contribution of GKS-EDA. For the orbital contribution of exc-EDA, the sum of CT and polarization of ALMO-EDA was considered, whereas only the polarization contribution of GKS-EDA was considered. In addition, for GKS-EDA there is a correlation term which corresponds to the difference of the correlation part of the density functional between fragments and system which does not have some correspondence in other EDA methods. Table S5 shows the comparison between the different methods for the fluorenone-methanol bond.

**Table S5.** EDA results of exc-EDA (with and without TDA), ALMO-EDA and GKS-EDA for the fluorenone-methanol bond.

|                       | Exc-u-EDA | Exc-r-EDA | Exc-u-EDA<br>(TDA) | Exc-r-EDA<br>(TDA) | ALMO-EDA | GKS-EDA |
|-----------------------|-----------|-----------|--------------------|--------------------|----------|---------|
| $\omega_{int}$        | -12       | -12       | -12                | -12                | -13      | -11     |
| $\omega_{pauli}$      | 13        | 13        | 13                 | 13                 | 2        | 2       |
| $\omega_{elstat}$     | -15       | -17       | -16                | -16                | -10      | -16     |
| $\omega_{orb}$        | -9        | -8        | -9                 | -9                 | -4       | 0       |
| $\omega_{corr}$       |           |           |                    |                    |          | 2       |
| $\Delta E_{int}^*$    | -38       | -38       | -38                | -38                | -23      | -32     |
| $\Delta E_{pauli}^*$  | 54        | 54        | 54                 | 54                 | 44       | 52      |
| $\Delta E_{elstat}^*$ | -60       | -62       | -61                | -61                | -54      | -63     |
| $\Delta E_{orb}^*$    | -31       | -30       | -31                | -31                | -22      | -16     |
| $\Delta E_{corr}^*$   |           |           |                    |                    |          | -5      |

[a] Energies in kJ mol<sup>-1</sup>.

The outcomes of the different approaches to investigate the interaction between quinoline and water in the excited state are illustrated in Figure S2 and Table S6.

**Table S6.** EDA results of exc-EDA (with and without TDA), ALMO-EDA and GKS-EDA for the quinoline-water bond.

|                       | Exc-u-EDA | Exc-r-EDA | Exc-u-EDA<br>(TDA) | Exc-r-EDA<br>(TDA) | ALMO-EDA | GKS-EDA |
|-----------------------|-----------|-----------|--------------------|--------------------|----------|---------|
| $\omega_{int}$        | -9        | -9        | 26                 | 26                 | 5        | -11     |
| $\omega_{pauli}$      | 11        | 139       | -17                | 149                | 9        | 1       |
| $\omega_{elstat}$     | -5        | -134      | 81                 | -113               | 43       | -7      |
| $\omega_{orb}$        | -16       | -14       | -39                | -10                | -30      | -14     |
| $\omega_{corr}$       |           |           |                    |                    |          | 10      |
| $\Delta E_{int}^*$    | -37       | -37       | -2                 | -2                 | -22      | -37     |
| $\Delta E_{pauli}^*$  | 67        | 194       | 39                 | 204                | 57       | 61      |
| $\Delta E_{elstat}^*$ | -61       | -191      | 25                 | -169               | -11      | -62     |
| $\Delta E_{orb}^*$    | -44       | -41       | -66                | -37                | -56      | -35     |
| $\Delta E_{corr}^*$   |           |           |                    |                    |          | -1      |

[a] Energies in  $\text{kJ mol}^{-1}$ .

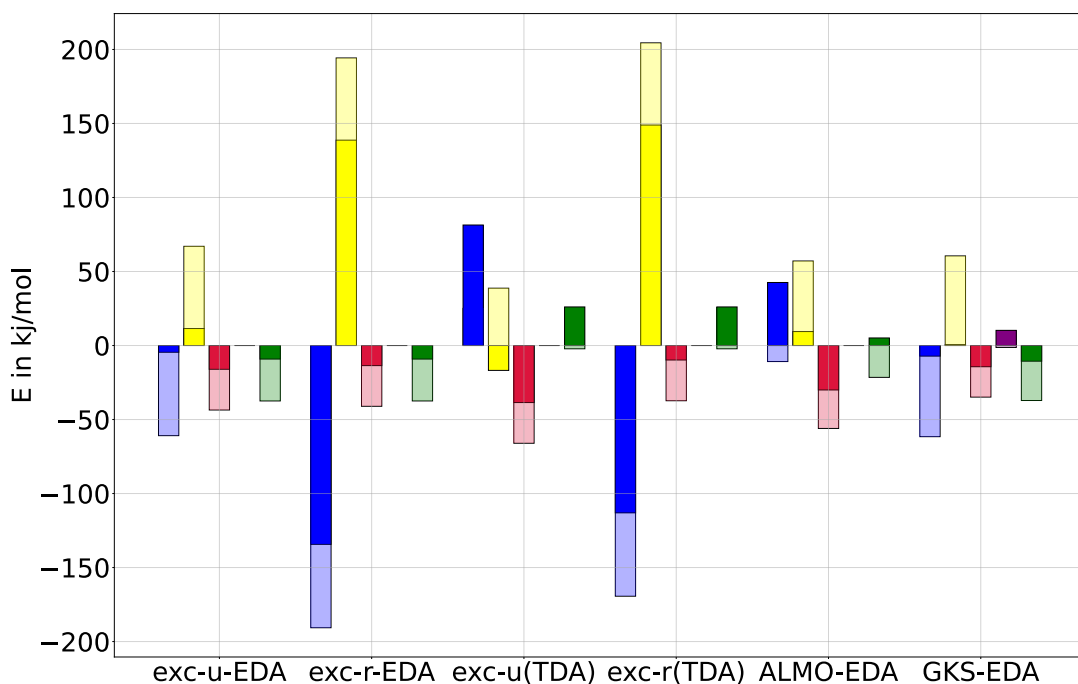

**Figure S2.** Comparing the exc-EDA (with and without TDA), ALMO-EDA and GKS-EDA for the first singlet excitation of benzene TCNE. Thereby is the electrostatic (blue), Pauli repulsion (yellow), orbital term (red) and interaction (green). Additionally, the correlation contribution (purple) is presented for GKS-EDA. The more intense colored bar represents the change in the respective contribution resulting from excitation, while the total (including the paler portion) bars indicate the value of the contribution for the excited state.

The outcomes of the different approaches to investigate the interaction between benzene and TCNE in the excited state are illustrated in Figure S3 and table S7.

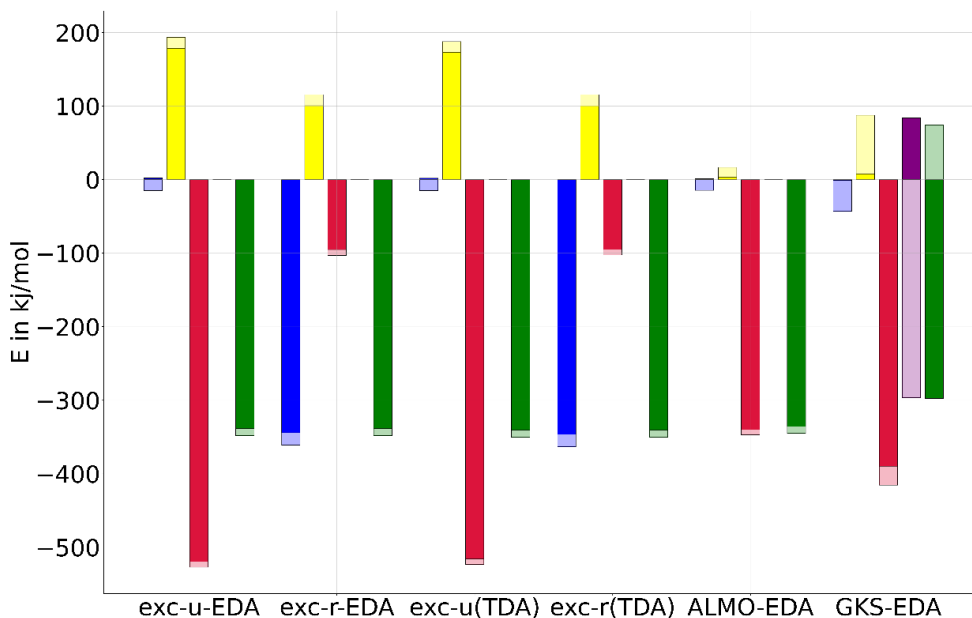

**Figure S3.** Comparing the exc-EDA (with and without TDA), ALMO-EDA and GKS-EDA for the first singlet excitation of benzene TCNE. Thereby is the electrostatic (blue), Pauli repulsion (yellow), orbital term (red) and interaction (green). Additionally, the correlation contribution (purple) is presented for GKS-EDA. The more intense colored bar represents the change in the respective contribution resulting from excitation, while the total (including the paler portion) bars indicate the value of the contribution for the excited state.

A comparison of the methods for the other test systems shows (especially for quinoline water) that the methods are divided into two groups (with and without TDA). The methods with TDA are ALMO-EDA and exc-EDA with TDA. The exc-u-EDA and ALMO-EDA show comparable results, with the exc-u-EDA showing slightly higher results. The Pauli contribution is particularly pronounced in exc-u-EDA compared to ALMO-EDA. However, the binding character is similar in both methods. In contrast, the exc-r-EDA results differ. The other groups consist of GKS-EDA and methods without TDA. The results are also similar for exc-u-EDA and GKS-EDA, whereas there are deviations from exc-r-EDA. The reason for this becomes clear when looking at the charge transfer excitation of the benzene-TCNE bond. In ALMO-EDA and GKS-EDA, the charge transfer

is considered in the orbital term in a similar way to exc-u-EDA, whereby ALMO-EDA explicitly combines these terms. In contrast, exc-r-EDA splits the CT over all EDA contributions. This is why the exc-r-EDA results differ from the other methods.

**Table S7.** EDA results of exc-EDA (with and without TDA), ALMO-EDA and GKS-EDA for the benzene-TCNE bond.

|                       | Exc-u-EDA | Exc-r-EDA | Exc-u-EDA<br>(TDA) | Exc-r-EDA<br>(TDA) | ALMO-EDA | GKS-EDA |
|-----------------------|-----------|-----------|--------------------|--------------------|----------|---------|
| $\omega_{int}$        | -12       | -12       | -12                | -12                | -13      | -11     |
| $\omega_{Pauli}$      | 179       | 101       | 173                | 101                | 3        | 7       |
| $\omega_{elstat}$     | 2         | -344      | 2                  | -347               | 1        | -1      |
| $\omega_{orb}$        | -519      | -95       | -516               | -95                | -340     | -390    |
| $\omega_{corr}$       |           |           |                    |                    |          | 84      |
| $\Delta E_{int}^*$    | -348      | -348      | -350               | -350               | -345     | -297    |
| $\Delta E_{Pauli}^*$  | 194       | 116       | 188                | 115                | 17       | 88      |
| $\Delta E_{elstat}^*$ | -15       | -361      | -15                | -363               | -15      | -43     |
| $\Delta E_{orb}^*$    | -527      | -103      | -523               | -103               | -347     | -415    |
| $\Delta E_{corr}^*$   |           |           |                    |                    |          | -74     |

[a] Energies in kJ mol<sup>-1</sup>.



## Pentacene oligomers

Values are given averaged over the monomers

**Table S8.** EDA results of new EDA method for pentacene oligomers in kJ/mol. The EDA contribution is displayed, as it undergoes alteration because of the excitation within the model. The outcomes obtained for the exc-u-EDA and exc-r-EDA. Thereby, the results are averaged over different excited monomers

| Unrelaxed              | Dimer | Tetramer | Tetramer 2 | Pentamer | Hexamer | Heptamer |
|------------------------|-------|----------|------------|----------|---------|----------|
| $\omega_{int}$         | -6    | -9       | -8         | -11      | -11     | -12      |
| $\omega_{Pauli}$       | 36    | 82       | 69         | 73       | 80      | 90       |
| $\omega_{elstat}$      | -1    | -2       | -1         | -2       | -1      | -2       |
| $\omega_{orb}$         | -41   | -89      | -76        | -81      | -89     | -101     |
| $\Delta E_{int}^*$     | -153  | -320     | -287       | -295     | -364    | -410     |
| $\Delta E_{int}(disp)$ | -52   | -117     | -107       | -109     | -135    | -154     |
| $\Delta E_{Pauli}^*$   | 38    | 95       | 85         | 89       | 95      | 108      |
| $\Delta E_{elstat}^*$  | -56   | -126     | -114       | -114     | -144    | -163     |
| $\Delta E_{orb}^*$     | -84   | -172     | -151       | -161     | -180    | -201     |
| Relaxed                | Dimer | Tetramer | Tetramer 2 | Pentamer | Hexamer | Heptamer |
| $\omega_{int}$         | -6    | -9       | -8         | -11      | -11     | -12      |
| $\omega_{Pauli}$       | 21    | 36       | 26         | 30       | 18      | 28       |
| $\omega_{elstat}$      | -8    | -13      | -10        | -14      | -15     | -18      |
| $\omega_{orb}$         | -18   | -31      | -24        | -26      | -15     | -22      |
| $\Delta E_{int}^*$     | -153  | -320     | -287       | -295     | -364    | -410     |
| $\Delta E_{int}(disp)$ | -52   | -117     | -107       | -109     | -135    | -154     |
| $\Delta E_{Pauli}^*$   | 23    | 49       | 42         | 47       | 33      | 46       |
| $\Delta E_{elstat}^*$  | -64   | -137     | -123       | -127     | -157    | -179     |
| $\Delta E_{orb}^*$     | -61   | -114     | -100       | -106     | -105    | -123     |

[a] Energies in kJ mol<sup>-1</sup>.

## Dimer

**Table S9.** EDA results of new EDA method for pentacene dimer in kJ/mol. The EDA contribution is displayed, as it undergoes alteration because of the excitation within the model. The outcomes obtained for the exc-u-EDA and exc-r-EDA. Thereby, the numeration of excited monomer corresponds to numeration of figure 5 from main paper

| Unrelaxed              | Frag 1 | Frag 2 |
|------------------------|--------|--------|
| $\omega_{int}$         | -7     | -5     |
| $\omega_{Pauli}$       | 13     | 59     |
| $\omega_{elstat}$      | 0      | -1     |
| $\omega_{orb}$         | -19    | -62    |
| $\Delta E_{int}^*$     | -154   | -152   |
| $\Delta E_{int}(disp)$ | -52    | -52    |
| $\Delta E_{Pauli}^*$   | 15     | 61     |
| $\Delta E_{elstat}^*$  | -56    | -57    |
| $\Delta E_{orb}^*$     | -62    | -105   |

  

| Relaxed                | Frag 1 | Frag 2 |
|------------------------|--------|--------|
| $\omega_{int}$         | -7     | -5     |
| $\omega_{Pauli}$       | 21     | 21     |
| $\omega_{elstat}$      | -10    | -7     |
| $\omega_{orb}$         | -18    | -18    |
| $\Delta E_{int}^*$     | -154   | -152   |
| $\Delta E_{int}(disp)$ | -52    | -52    |
| $\Delta E_{Pauli}^*$   | 23     | 23     |
| $\Delta E_{elstat}^*$  | -65    | -63    |
| $\Delta E_{orb}^*$     | -61    | -61    |

[a] Energies in kJ mol<sup>-1</sup>.

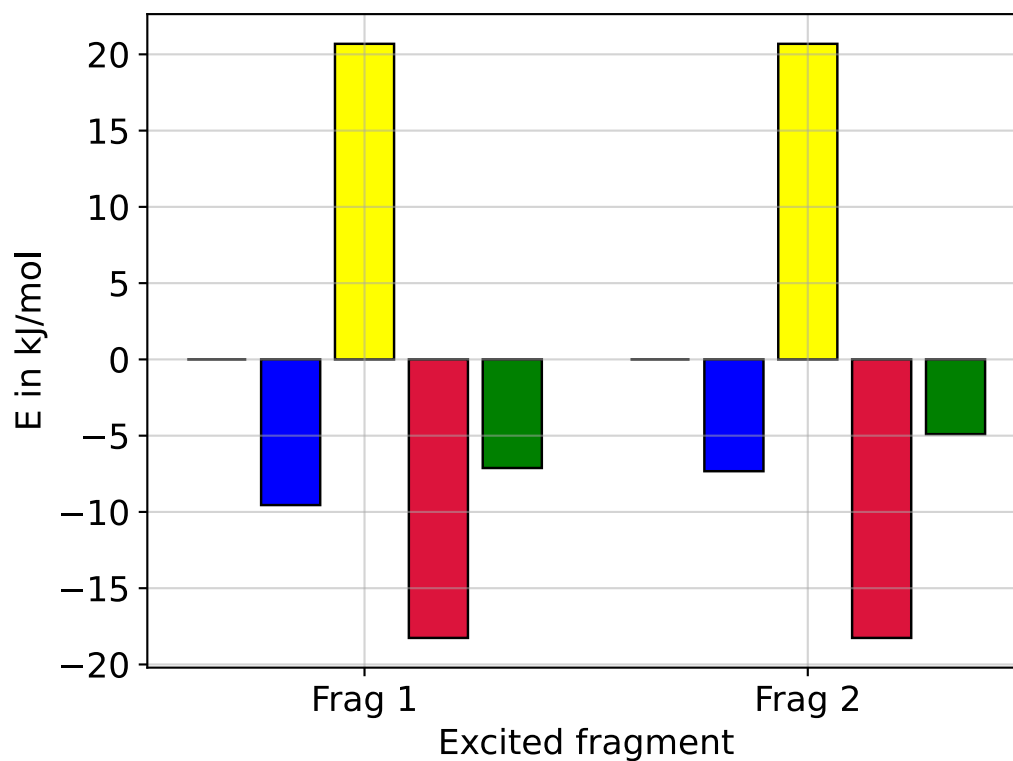

**Figure S4.** Exc-u-EDA for the first singlet excitation of pentacene dimer, whereby different monomers are excited. Thereby is the electrostatic (blue), Pauli repulsion (yellow), orbital term (red) and interaction (green).



**Figure S5.** Exc-r-EDA for the first singlet excitation of pentacene dimer, whereby different monomers are excited. Thereby is the electrostatic (blue), Pauli repulsion (yellow), orbital term (red) and interaction (green).

## Tetramer

**Table S10.** EDA results of new EDA method for pentacene tetramer in kJ/mol. The EDA contribution is displayed, as it undergoes alteration because of the excitation within the model. The outcomes obtained for the exc-u-EDA and exc-r-EDA. Thereby, the numeration of excited monomer corresponds to numeration of figure 5 from main paper

| Unrelaxed              | Frag 1 | Frag 2 | Frag 3 | Frag 4 |
|------------------------|--------|--------|--------|--------|
| $\omega_{int}$         | -9     | -9     | -9     | -9     |
| $\omega_{Pauli}$       | 70     | 93     | 93     | 70     |
| $\omega_{elstat}$      | -2     | -2     | -2     | -2     |
| $\omega_{orb}$         | -77    | -100   | -100   | -77    |
| $\Delta E_{int}^*$     | -283   | -356   | -356   | -283   |
| $\Delta E_{int}(disp)$ | -104   | -131   | -131   | -104   |
| $\Delta E_{Pauli}^*$   | 82     | 108    | 108    | 82     |
| $\Delta E_{elstat}^*$  | -110   | -141   | -142   | -110   |
| $\Delta E_{orb}^*$     | -151   | -192   | -192   | -152   |
| Relaxed                | Frag 1 | Frag 2 | Frag 3 | Frag 4 |
| $\omega_{int}$         | -9     | -9     | -9     | -9     |
| $\omega_{Pauli}$       | 37     | 34     | 34     | 37     |
| $\omega_{elstat}$      | -12    | -15    | -15    | -12    |
| $\omega_{orb}$         | -34    | -27    | -27    | -34    |
| $\Delta E_{int}^*$     | -283   | -356   | -356   | -283   |
| $\Delta E_{int}(disp)$ | -104   | -131   | -131   | -104   |
| $\Delta E_{Pauli}^*$   | 48     | 49     | 49     | 48     |
| $\Delta E_{elstat}^*$  | -119   | -155   | -155   | -119   |
| $\Delta E_{orb}^*$     | -108   | -119   | -120   | -108   |

[a] Energies in kJ mol<sup>-1</sup>.

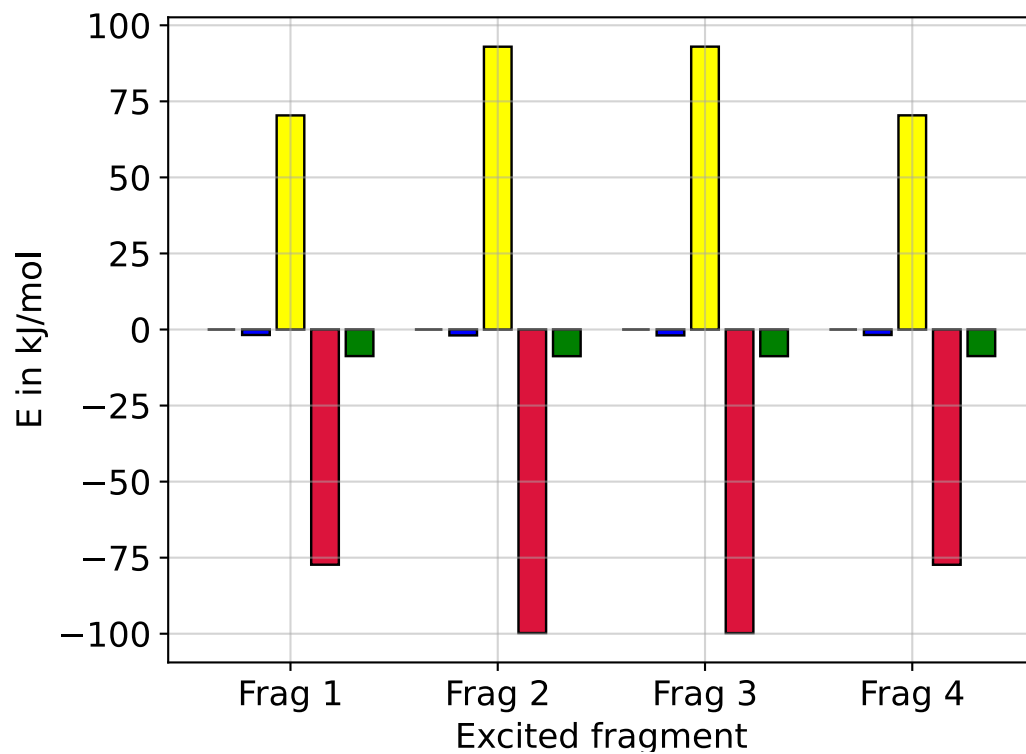

**Figure S6.** Exc-u-EDA for the first singlet excitation of pentacene tetramer, whereby different monomers are excited. Thereby is the electrostatic (blue), Pauli repulsion (yellow), orbital term (red) and interaction (green).

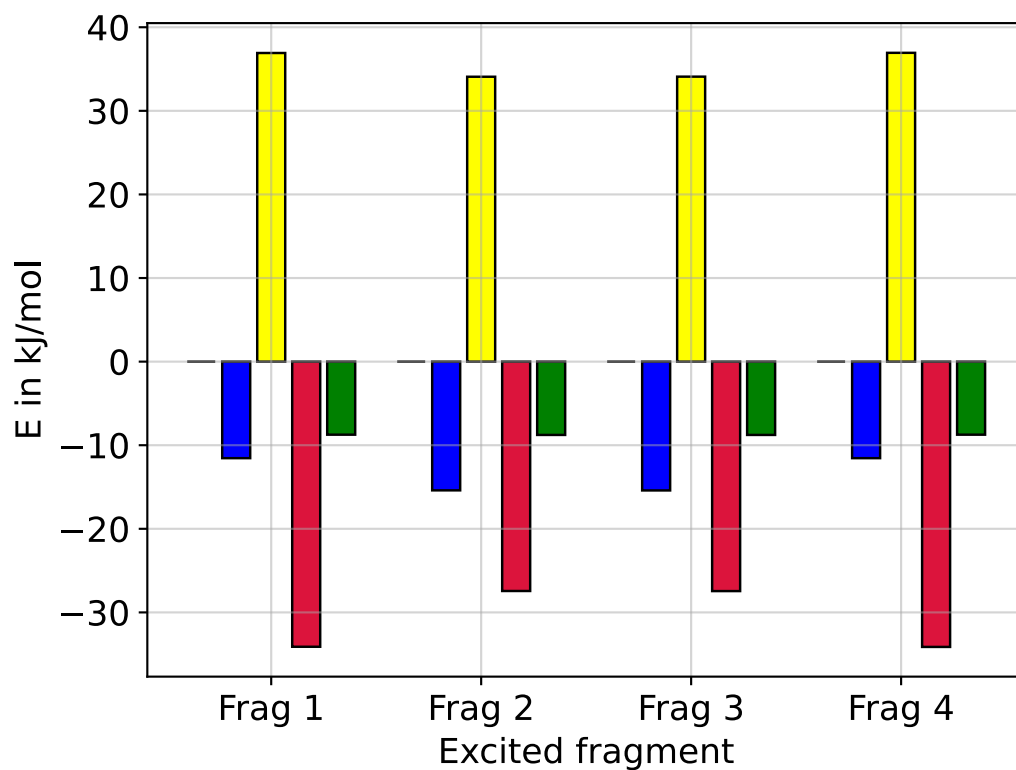

**Figure S7.** Exc-r-EDA for the first singlet excitation of pentacene tetramer, whereby different monomers are excited. Thereby is the electrostatic (blue), Pauli repulsion (yellow), orbital term (red) and interaction (green).

## Tetramer 2

**Table S11.** EDA results of new EDA method for pentacene tetramer 2 in kJ/mol. The EDA contribution is displayed, as it undergoes alteration because of the excitation within the model. The outcomes obtained for the exc-u-EDA and exc-r-EDA. Thereby, the numeration of excited monomer corresponds to numeration of figure 5 from main paper

| Unrelaxed              | Frag 1 | Frag 2 | Frag 3 | Frag 4 |
|------------------------|--------|--------|--------|--------|
| $\omega_{int}$         | -8     | -8     | -8     | -8     |
| $\omega_{Pauli}$       | 77     | 91     | 84     | 25     |
| $\omega_{elstat}$      | -1     | -2     | -2     | -1     |
| $\omega_{orb}$         | -83    | -97    | -90    | -32    |
| $\Delta E_{int}^*$     | -225   | -348   | -352   | -224   |
| $\Delta E_{int}(disp)$ | -82    | -132   | -132   | -82    |
| $\Delta E_{Pauli}^*$   | 87     | 117    | 105    | 30     |
| $\Delta E_{elstat}^*$  | -88    | -142   | -143   | -82    |
| $\Delta E_{orb}^*$     | -143   | -191   | -182   | -90    |
| Relaxed                | Frag 1 | Frag 2 | Frag 3 | Frag 4 |
| $\omega_{int}$         | -8     | -8     | -8     | -8     |
| $\omega_{Pauli}$       | 13     | 24     | 34     | 35     |
| $\omega_{elstat}$      | -9     | -5     | -15    | -12    |
| $\omega_{orb}$         | -11    | -26    | -27    | -31    |
| $\Delta E_{int}^*$     | -225   | -348   | -352   | -224   |
| $\Delta E_{int}(disp)$ | -82    | -132   | -132   | -82    |
| $\Delta E_{Pauli}^*$   | 24     | 50     | 55     | 41     |
| $\Delta E_{elstat}^*$  | -96    | -145   | -156   | -93    |
| $\Delta E_{orb}^*$     | -71    | -121   | -119   | -89    |

[a] Energies in kJ mol<sup>-1</sup>.



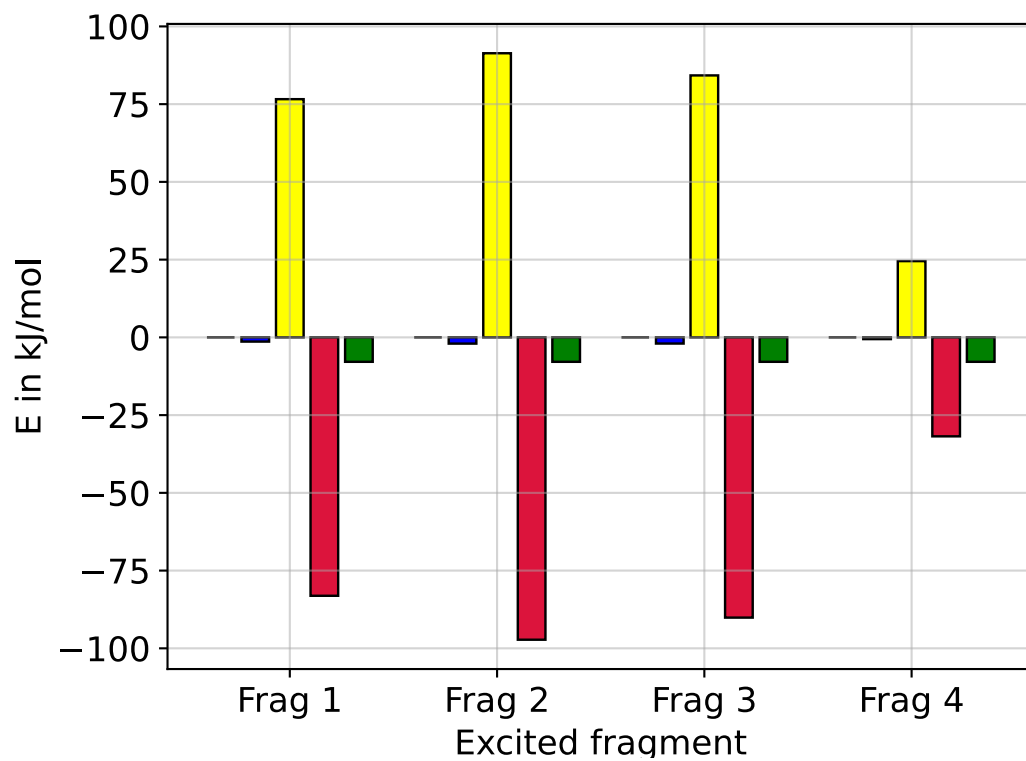

**Figure S8.** Exc-u-EDA for the first singlet excitation of pentacene tetramer 2, whereby different monomers are excited. Thereby is the electrostatic (blue), Pauli repulsion (yellow), orbital term (red) and interaction (green).

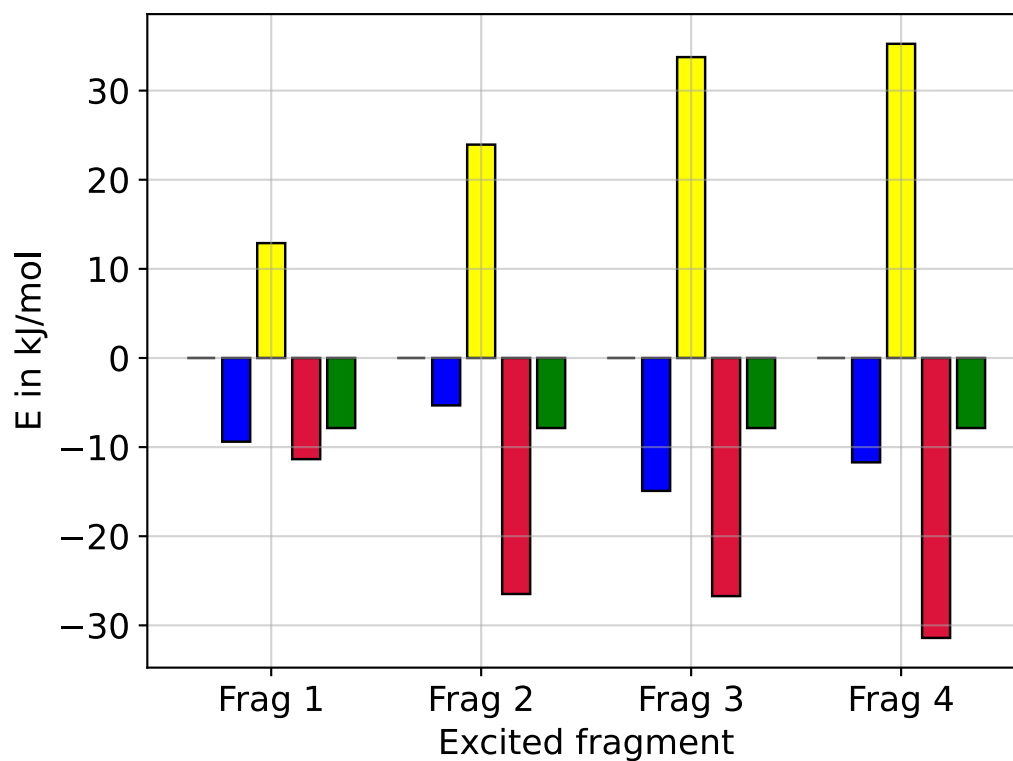

**Figure S9.** Exc-r-EDA for the first singlet excitation of pentacene tetramer 2, whereby different monomers are excited. Thereby is the electrostatic (blue), Pauli repulsion (yellow), orbital term (red) and interaction (green).

## Pentamer

**Table S12.** EDA results of new EDA method for pentacene pentamers in kJ/mol. The EDA contribution is displayed, as it undergoes alteration because of the excitation within the model. The outcomes obtained for the exc-u-EDA and exc-r-EDA. Thereby, the numeration of excited monomer corresponds to numeration of figure 5 from main paper

| Unrelaxed              | Frag 1 | Frag 2 | Frag 3 | Frag 4 | Frag 5 |
|------------------------|--------|--------|--------|--------|--------|
| $\omega_{int}$         | -11    | -11    | -11    | -11    | -11    |
| $\omega_{pauli}$       | 25     | 77     | 158    | 77     | 25     |
| $\omega_{elstat}$      | -1     | -1     | -4     | -1     | -1     |
| $\omega_{orb}$         | -35    | -86    | -164   | -86    | -35    |
| $\Delta E_{int}^*$     | -236   | -230   | -543   | -230   | -236   |
| $\Delta E_{int}(disp)$ | -85    | -84    | -206   | -84    | -85    |
| $\Delta E_{pauli}^*$   | 29     | 88     | 213    | 88     | 29     |
| $\Delta E_{elstat}^*$  | -85    | -87    | -226   | -87    | -85    |
| $\Delta E_{orb}^*$     | -95    | -145   | -324   | -145   | -95    |
| Relaxed                | Frag 1 | Frag 2 | Frag 3 | Frag 4 | Frag 5 |
| $\omega_{int}$         | -11    | -11    | -11    | -11    | -11    |
| $\omega_{pauli}$       | 28     | 10     | 74     | 10     | 28     |
| $\omega_{elstat}$      | -6     | -10    | -41    | -10    | -6     |
| $\omega_{orb}$         | -32    | -11    | -43    | -11    | -32    |
| $\Delta E_{int}^*$     | -236   | -230   | -543   | -230   | -236   |
| $\Delta E_{int}(disp)$ | -85    | -84    | -206   | -84    | -85    |
| $\Delta E_{pauli}^*$   | 32     | 21     | 129    | 21     | 32     |
| $\Delta E_{elstat}^*$  | -90    | -96    | -263   | -96    | -90    |
| $\Delta E_{orb}^*$     | -92    | -70    | -203   | -70    | -92    |

[a] Energies in kJ mol<sup>-1</sup>.

## Hexamer

**Table S13.** EDA results of new EDA method for pentacene hexamer in kJ/mol. The EDA contribution is displayed, as it undergoes alteration because of the excitation within the model. The outcomes obtained for the exc-u-EDA and exc-r-EDA. Thereby, the numeration of excited monomer corresponds to numeration of figure 5 from main paper

| Unrelaxed              | Frag 1 | Frag 2 | Frag 3 | Frag 4 | Frag 5 | Frag 6 |
|------------------------|--------|--------|--------|--------|--------|--------|
| $\omega_{int}$         | -11    | -11    | -11    | -11    | -11    | -11    |
| $\omega_{Pauli}$       | 30     | 81     | 141    | 75     | 71     | 82     |
| $\omega_{elstat}$      | 0      | -2     | -3     | -1     | -1     | -1     |
| $\omega_{orb}$         | -40    | -91    | -148   | -85    | -81    | -91    |
| $\Delta E_{int}^*$     | -244   | -363   | -601   | -360   | -246   | -368   |
| $\Delta E_{int}(disp)$ | -87    | -135   | -230   | -134   | -89    | -136   |
| $\Delta E_{Pauli}^*$   | 36     | 100    | 169    | 89     | 80     | 94     |
| $\Delta E_{elstat}^*$  | -94    | -147   | -240   | -139   | -97    | -146   |
| $\Delta E_{orb}^*$     | -99    | -181   | -301   | -176   | -141   | -181   |

  

| Relaxed                | Frag 1 | Frag 2 | Frag 3 | Frag 4 | Frag 5 | Frag 6 |
|------------------------|--------|--------|--------|--------|--------|--------|
| $\omega_{int}$         | -11    | -11    | -11    | -11    | -11    | -11    |
| $\omega_{Pauli}$       | 14     | 14     | 35     | 18     | 8      | 21     |
| $\omega_{elstat}$      | -11    | -18    | -24    | -10    | -9     | -15    |
| $\omega_{orb}$         | -14    | -6     | -22    | -19    | -10    | -16    |
| $\Delta E_{int}^*$     | -244   | -363   | -601   | -360   | -246   | -368   |
| $\Delta E_{int}(disp)$ | -87    | -135   | -230   | -134   | -89    | -136   |
| $\Delta E_{Pauli}^*$   | 21     | 32     | 63     | 32     | 17     | 34     |
| $\Delta E_{elstat}^*$  | -105   | -163   | -260   | -148   | -105   | -160   |
| $\Delta E_{orb}^*$     | -73    | -96    | -175   | -110   | -70    | -106   |

[a] Energies in kJ mol<sup>-1</sup>.

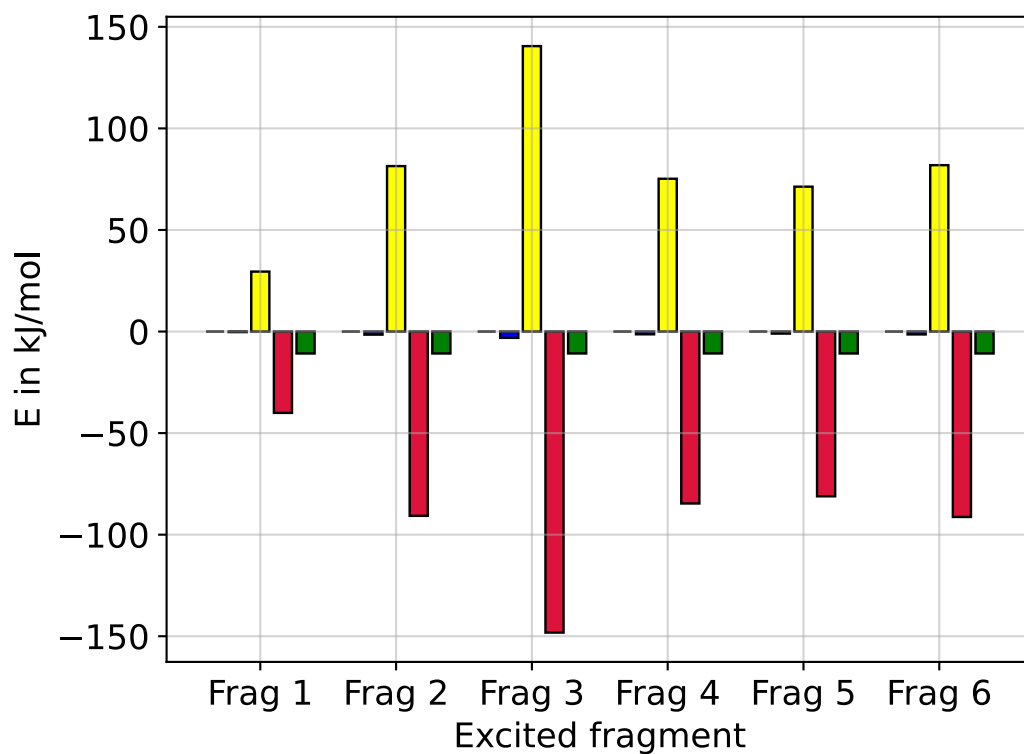

**Figure S10.** Exc-u-EDA for the first singlet excitation of pentacene hexamer, whereby different monomers are excited. Thereby is the electrostatic (blue), Pauli repulsion (yellow), orbital term (red) and interaction (green).

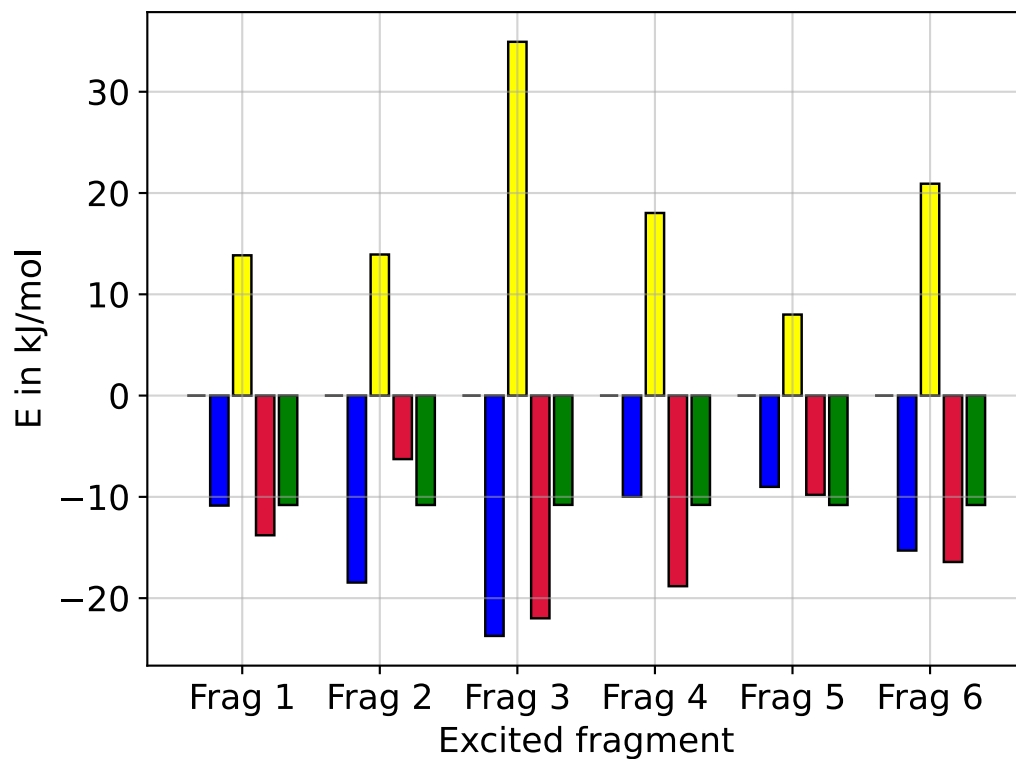

**Figure S11.** Exc-r-EDA for the first singlet excitation of pentacene hexamer, whereby different monomers are excited. Thereby is the electrostatic (blue), Pauli repulsion (yellow), orbital term (red) and interaction (green).

## Heptamer

**Table S14.** EDA results of new EDA method for pentacene heptamer in kJ/mol. The EDA contribution is displayed, as it undergoes alteration because of the excitation within the model. The outcomes obtained for the exc-u-EDA and exc-r-EDA. Thereby, the numeration of excited monomer corresponds to numeration of figure 5 from main paper

| Unrelaxed              | Frag 1 | Frag 2 | Frag 3 | Frag 4 | Frag 5 | Frag 6 | Frag 7 |
|------------------------|--------|--------|--------|--------|--------|--------|--------|
| $\omega_{int}$         | -12    | -12    | -12    | -12    | -12    | -12    | -12    |
| $\omega_{Pauli}$       | 82     | 82     | 75     | 152    | 75     | 82     | 82     |
| $\omega_{elstat}$      | -1     | -2     | -1     | -3     | -1     | -2     | -1     |
| $\omega_{orb}$         | -93    | -92    | -86    | -162   | -86    | -92    | -93    |
| $\Delta E_{int}^*$     | -371   | -367   | -362   | -671   | -362   | -367   | -371   |
| $\Delta E_{int}(disp)$ | -137   | -137   | -135   | -263   | -135   | -137   | -137   |
| $\Delta E_{Pauli}^*$   | 94     | 100    | 89     | 190    | 89     | 100    | 94     |
| $\Delta E_{elstat}^*$  | -146   | -147   | -139   | -275   | -139   | -147   | -146   |
| $\Delta E_{orb}^*$     | -182   | -183   | -177   | -323   | -177   | -183   | -182   |
| Relaxed                | Frag 1 | Frag 2 | Frag 3 | Frag 4 | Frag 5 | Frag 6 | Frag 7 |
| $\omega_{int}$         | -12    | -12    | -12    | -12    | -12    | -12    | -12    |
| $\omega_{Pauli}$       | 26     | 18     | 12     | 81     | 12     | 18     | 26     |
| $\omega_{elstat}$      | -13    | -9     | -6     | -70    | -6     | -9     | -13    |
| $\omega_{orb}$         | -26    | -21    | -19    | -23    | -19    | -21    | -26    |
| $\Delta E_{int}^*$     | -371   | -367   | -362   | -671   | -362   | -367   | -371   |
| $\Delta E_{int}(disp)$ | -137   | -137   | -135   | -263   | -135   | -137   | -137   |
| $\Delta E_{Pauli}^*$   | 39     | 36     | 26     | 119    | 26     | 36     | 39     |
| $\Delta E_{elstat}^*$  | -157   | -155   | -144   | -342   | -144   | -155   | -157   |
| $\Delta E_{orb}^*$     | -115   | -111   | -110   | -185   | -110   | -111   | -115   |

[a] Energies in kJ mol<sup>-1</sup>.

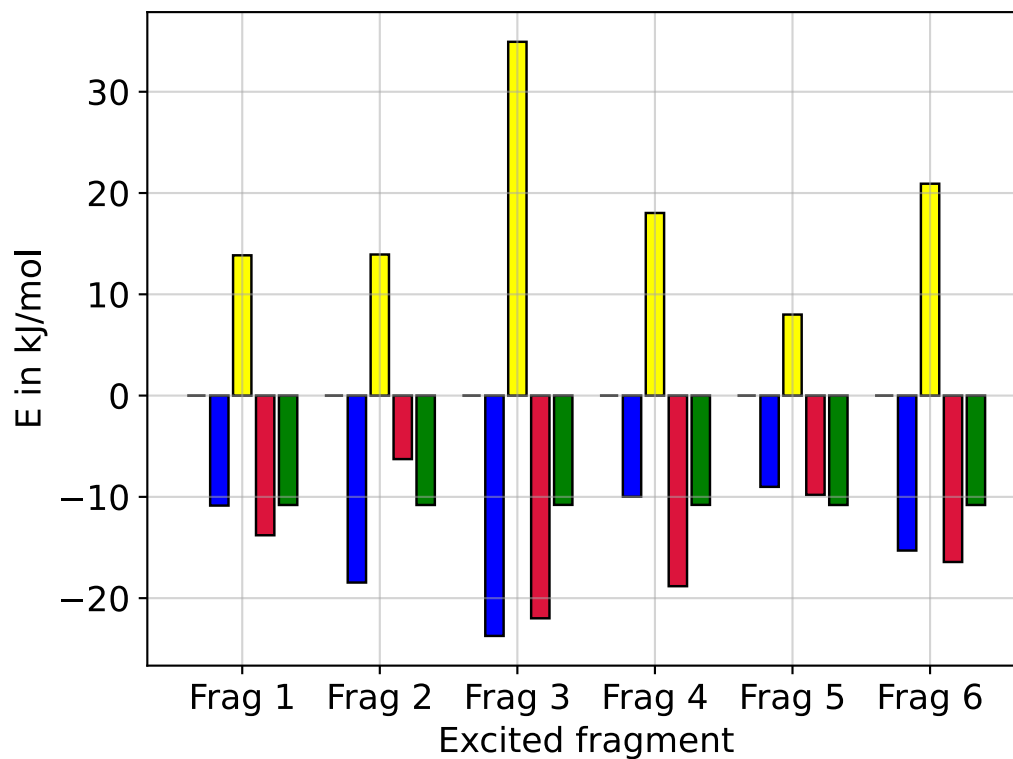

**Figure S12.** Exc-u-EDA for the first singlet excitation of pentacene heptamer, whereby different monomers are excited. Thereby is the electrostatic (blue), Pauli repulsion (yellow), orbital term (red) and interaction (green).



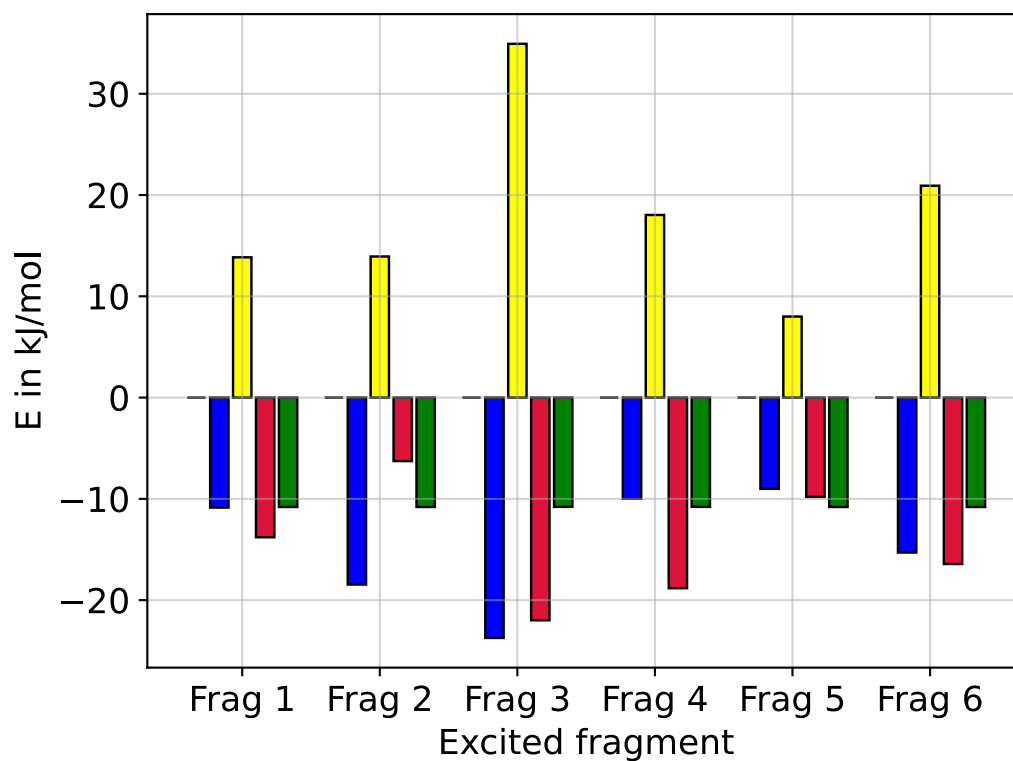

**Figure S13.** Exc-r-EDA for the first singlet excitation of pentacene heptamer, whereby different monomers are excited. Thereby is the electrostatic (blue), Pauli repulsion (yellow), orbital term (red) and interaction (green).
